# Why is age determination of Baltic cod (*Gadus morhua*) so difficult?

Karin Hüsey

Hüsey, K. 2010. Why is age determination of Baltic cod (*Gadus morhua*) so difficult? – ICES Journal of Marine Science, 67: 1198–1205.

The aim of this study was to evaluate the consistency of three methods for assigning annuli in adult Baltic cod otoliths. The methods examined were (i) daily increment patterns, (ii) opacity profiles, and (iii) traditional age reading. Frequency distributions of the distance from the nucleus to the different zones showed that the first annulus of traditional age reading missed the first zone of both increment and opacity methods, but overlapped with the second zone identified by these methods. This pattern did not continue over subsequent zones. Frequency distributions of increment patterns were similar to opacity patterns. However, within individual fish, the co-occurrence of overlap between the two patterns was random. In cases where there was overlap, translucent zone formation started just before the disappearance of visible increments. Overlap in 1 year did not necessarily lead to a consistent pattern the following year, and overlap was not influenced by sex or fish size. The results suggest that otolith opacity in Baltic cod is not associated with seasonal patterns in daily increment structure and that traditional age determination based on otolith opacity yields highly uncertain estimates of age.

**Keywords:** ageing methods, Baltic cod, daily increment patterns, opacity patterns.

Received 30 October 2009; accepted 18 February 2010; advance access publication 7 April 2010.

K. Hüsey: National Institute of Aquatic Resources, Technical University of Denmark, Jaegersborg Alle 1, 2920 Charlottenlund, Denmark. tel: +45 33 963458; fax: +45 33 963333; e-mail: kh@aqu.dtu.dk.

## Introduction

Since the first description of periodic patterns of opaque and translucent growth structures in otoliths and their relationship with fish age (Reibisch, 1899), the use of this technique has become globally accepted and is used for routine age determination of many fish species (Campana, 2001; Campana and Thorrold, 2001). Translucent zones have traditionally been called “winter rings” and counted to determine the age of a fish (Pannella, 1974; Smedstad and Holm, 1996). In most Northeast Atlantic ecosystems, cod (*Gadus morhua*) experience more or less pronounced variations in temperature which lead to distinct, annual opacity patterns in otolith macrostructure (Weidman and Millner, 2000; Høie and Folkvord, 2006). Recently, evidence has been found for several stocks that these zones may actually form during summer, but still following an annual pattern (Pilling *et al.*, 2007). At high temperatures, metabolic maintenance costs are high and feeding may be restricted (Jobling, 1988; Björnsson and Steinarsson, 2002). Hence, a temperature effect on growth and deposition may actually be supplemented by a starvation effect.

Typically, stocks from areas with smaller seasonal temperature signals, such as the Faroe Islands and Baltic Sea, show less contrast between opaque and translucent zones (CODYSSEY, 2007). However, in the Faroese stock, annually recurring features give an accurate estimate of the age of the fish (Doering-Arjes *et al.*, 2008). The eastern Baltic cod seems to diverge from the general pattern. Although the amplitude of seasonal temperature variations is greater than for Faroese cod, the visual contrast in their otoliths is low. The unique combinations of prolonged spawning

season (MacKenzie *et al.*, 2000; Wieland *et al.*, 2000), the heterogeneous hydrography of the Baltic Sea (Matthäus and Franck, 1992; Schinke and Matthäus, 1998), coupled with interacting seasonal variations in feeding intensity (Bagge, 1981; Maczassek, 2006) and temperature have been hypothesized to result in an optically rather uniform otolith structure lacking a strong seasonal variation in opacity (Hüsey *et al.*, 2009). Also, there are confounding non-annual structures at apparently irregular intervals (Berner, 1968). As a consequence, annual rings are not clearly defined, are not necessarily laid down at regular intervals, and age determination by traditional methods may therefore be subject to serious inconsistencies (Reeves, 2003; ICES, 2006).

These conditions call for rigorous validation of annulus formation. Today, a suite of technologies and methods is available, most of which include examination of biological tags/features in the otolith or mark/recapture (see review in Campana, 2001). No such validation studies yet exist for eastern Baltic cod. Based on the known temperature dependence of otolith accretion (Mosegaard and Titus, 1987; Volk *et al.*, 1990; Otterlei *et al.*, 2002; Hüsey and Mosegaard, 2004) and periodic cycles of increment patterns observed in the otoliths of adult fish, Hüsey *et al.* (2010) proposed that these patterns could be used for age estimation and hence validation of annulus formation.

The aim of the present study is therefore to evaluate whether patterns of increment widths and opacity match, whether they are influenced by conditions the year before, and how they are influenced by fish size and sex. This assessment is then followed up with an evaluation of how these patterns compare with the structures identified as annuli by traditional age readers.

## Material and methods

The samples used in this study were the same as those in the study of Hüssy *et al.* (2010). Cod <40 cm were selected randomly from the Danish Baltic International Trawl Survey from the first quarter of the years 2001 and 2004 in ICES Subdivision (SD) 25 (Figure 1). Fish were measured to the nearest centimetre and weighed (g) on board. Sagittal otoliths were removed, cleaned, and stored individually in labelled paper bags. None of the fish were spawning, confirming their stock origin as eastern Baltic cod, the spawning period of which extends from April to September as opposed to that of western Baltic (SD 22–24) cod, which spawn in February and March (Wieland *et al.*, 2000).

## Daily increment patterns

A segment was cut from the central transverse plane of the otolith (ISOMET 1000 Buehler), fixed on a microscope slide with thermoplastic glue (Buehler Thermoplastic Cement no. 40-8100), and ground to the central plane on a rotating disc with abrasive paper (grit 30 to 0.3  $\mu\text{m}$ ) to a thickness of  $\sim 200 \mu\text{m}$  and polished with 1.0  $\mu\text{m}$  alumina paste. Otolith sections were viewed under a microscope (Leica DMLB) and the images digitized (Leica DFC320 camera and Leica IM 50 framegrabber) using a standard set-up (8 bit/channel with a frame of  $2048 \times 1536$  pixels, exposure 100–500 ms).

Daily growth increments were examined at a magnification of  $0.08 \mu\text{m pixel}^{-1}$ , based on otolith optical characteristics in the form of a profile of grey values (caliper tool of IMAGE PRO), ranging between 0 (black) and 255 (pure white). The start of an increment was defined as a rising point of inflection between the previously formed opaque zone and the subsequent transparent zone and was calculated from the divergence of individual pixel grey values from the running average. Distance from nucleus on

progressing days  $i$  was calculated as  $\text{Distance}_i = \text{Distance}_{i-1} + \text{Increment}_i$ . Areas of the profile where increments were not visible were treated by recording the width of these zones and calculating the relative otolith radius at which increments were again visible, following the same procedure. This resulted in growth profiles from the centre to the edge with individual increment widths in relation to distance from the nucleus. These sections of the otoliths revealed a series of zones with clearly distinguishable increments, with increasing/decreasing widths in a dome-shaped pattern, interrupted by zones where there was no visible regular increment structure. The width of the zones averaged  $115 \mu\text{m}$  (range 40–250  $\mu\text{m}$ ), and hereafter they are referred to as  $U$ -zones. The distances from the otolith centre to the midpoints of zones without visible increments is hereafter referred to as  $U_1$ ,  $U_2$ , and  $U_3$ , corresponding to the zones formed during the first, second, and third winter and calculated as  $U_n = (U_{n\text{end}} - U_{n\text{start}})/2$  (Figure 2).

## Reader-defined marks

To assess the overlap between increment patterns and traditional age determination, the location of annuli used for the latter was recorded. Otolith sections were viewed under a stereomicroscope (Leica MZ6) at a magnification of  $2.8 \mu\text{m pixel}^{-1}$  using reflected light in a standardized set-up (IBACS, 2006). Images were digitized using a standard set-up (8 bit/channel with a frame of  $2048 \times 1536$  pixels, exposure 107.9 ms). The midpoint of each zone counted by expert readers as an annulus was marked with the “measurement” tool of IMAGE PRO (v. 5.0). For comparison with daily increment patterns, the ventral axis was selected. Subsequently, the distance of each mark to the nucleus was measured and counted as  $R_1$ ,  $R_2$ , and  $R_3$ , referring to these reader-defined annuli as  $R$ -zones.

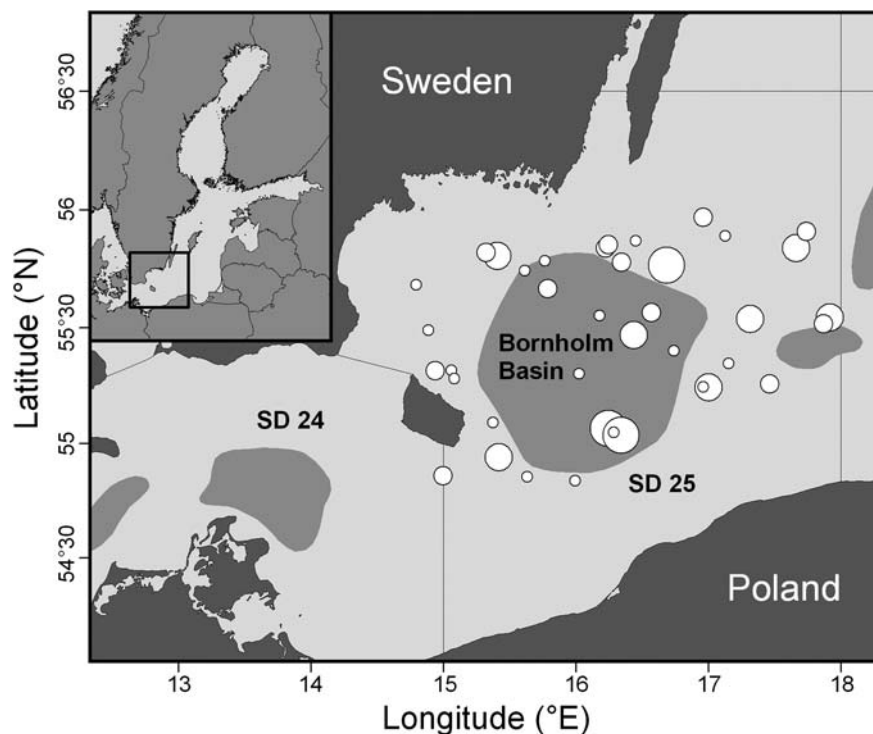

**Figure 1.** The locations of eastern Baltic cod samples in ICES SD 25, 2001 and 2004 combined. The spawning area in the Bornholm Basin is shown; white bubbles, sampling stations, where the size indicates the number of cod analysed (size ranges 1–5, 6–10, 11–15, and 16–25).

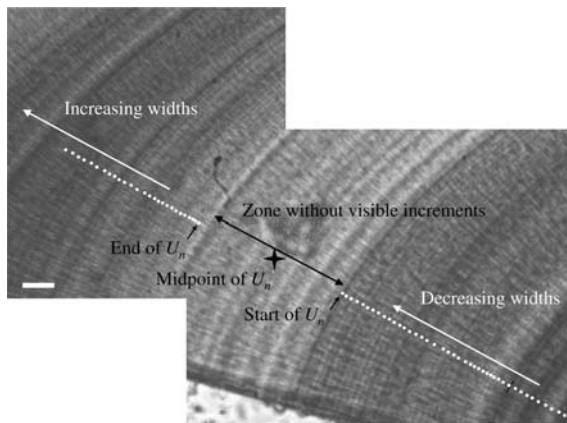

**Figure 2.** Example of a zone of a Baltic cod otolith without a visible increment, and the measurements used to calculate the midpoint of the zone (star). Bar = 10  $\mu\text{m}$ .

### Opacity-derived marks

To obtain an objective measure of annulus location, profiles of opacity were recorded under reflected light along the same growth axis, from nucleus to ventral otolith edge. Profile values range between 0 (black) and 255 (pure white), the lower values associated with less opacity. Therefore, an annulus appears as “dark” owing to its lower opacity. The opacity profiles were then run through the following routine. First, a second-order polynomial function was fitted to the data for each cod individually. Residuals were calculated for each pixel (profile values – function estimate) and smoothed with a running average over 50  $\mu\text{m}$  for the entire profile. The smoothed residuals were then run through a simple analysis, where a negative value was assigned as a translucent ring, and a positive value as the intermittent growth period. To exclude noise, e.g. through cracks in the sample, or bubbles under the otolith section, assignment of a translucent ring was restricted to zones  $\geq 30 \mu\text{m}$ , corresponding to the smallest zone without daily increments. The location of a translucent ring was then recorded as the distance from the nucleus to the midpoint within each zone of negative residuals, where the midpoint of a zone was assigned as a  $U$ -zone. Translucent rings were numbered starting from the nucleus as  $T_1$ ,  $T_2$ ,  $T_3$ , and  $T_4$  (with this procedure, there were four marks in five fish). The zones with low opacity were thereafter referred to as  $T$ -zones.

### Overlap

Overlap was defined where any translucent ring ( $T_1$ ,  $T_2$ ,  $T_3$ , or  $T_4$ ) co-occurred within a zone of  $\pm 150 \mu\text{m}$  from the midpoint of an individual zone without visible increments ( $U_1$ ,  $U_2$ ,  $U_3$ ). Hence, overlap does not include possible additional low-opacity zones, but only relates to low-opacity patterns in zones without visible increments. A value of 1 indicates overlap between zones, and 0 no overlap. The 300- $\mu\text{m}$  interval was chosen based on the widest zone without visible increments found in these cod otoliths to allow for some flexibility regarding the opacity values and the low contrast between the growth zones of Baltic cod. In all, 31 and 27 sections with reader-defined annuli, increment patterns, and opacity profiles from centre to edge were prepared for 2001 and 2004, respectively.

### Statistical analyses

All statistical analyses were carried out in R (R Development Core Team, 2009). Continuous data were tested for normality and homogeneity of variances using a Shapiro–Wilk normality test and the Bartlett test of homogeneity of variances. For normality and variance homogeneity, data were compared with ANOVA. Non-normally distributed data were tested with the Kolmogorov–Smirnov (from now on KS) two-sample tests, and overlap patterns with  $G$ -tests.

### Results

The frequency distributions of distances from the nucleus to zones identified by the three methods differed markedly from each other (Figure 3). There were no significant differences in frequency distributions between years of  $U$ -zones ( $U_1$ ,  $U_2$ , and  $U_3$ ),  $R$ -zones ( $R_1$  and  $R_2$ ), or  $T$ -zones ( $T_1$ ,  $T_2$ ,  $T_3$ , and  $T_4$ ; KS, all  $p > 0.05$ ). Data from the two years were therefore combined for all the three methods.

### Reader-defined annuli and translucent zones

The frequency distribution of  $T$ -zones differed considerably from that of  $R$ -zones (Figure 3). There were significant differences with respect to both the first annulus (Figure 3a; KS,  $D = 0.6165$ ,  $p < 0.001$ ) and the second annulus (Figure 3b; KS,  $D = 0.7551$ ,  $p < 0.001$ ), but the distribution of the first reader-defined annulus ( $R_1$ ) corresponded to the second translucent ring ( $T_2$ , KS,  $D = 0.247$ ,  $p = 0.073$ ). This implies that the first zone with lower opacity is not counted as an annulus by traditional age-reading methods. The pattern did not, however, persist over the next age class, because the distributions of  $T_3$  and  $R_2$  differed significantly (Figure 3c; KS,  $D = 0.4121$ ,  $p < 0.05$ ). Therefore, although experts at age reading use opacity patterns for assigning annuli, interpretation of the patterns seems to be very subjective for Baltic cod. Owing to the lack of significance in frequency distributions with reader-defined annuli, overlap with these zones was not examined in further detail.

### Reader-defined annuli and zones without visible increments

The frequency distribution of  $U$ -zones differed considerably from that of  $R$ -zones (Figure 3). The mode of  $U_1$  was at 450  $\mu\text{m}$ , smaller than the smallest values of  $R_1$  (Figure 3a). This difference was highly significant (KS,  $D = 0.8224$ ,  $p < 0.001$ ), as was the difference between  $U_2$  and  $R_2$  (Figure 3b; KS,  $D = 0.06542$ ,  $p < 0.001$ ). The distribution of the second zone without visible increments ( $U_2$ ) did not correspond to the first reader-defined annulus ( $R_1$ ; KS,  $D = 0.3037$ ,  $p < 0.05$ ), nor did  $U_3$  correspond to  $R_2$  (KS,  $D = 0.1458$ ,  $p = 0.95$ ). This implies that the first winter zone (without visible increments) is missed by traditional age-reading methods. Hence, there is no consistent pattern in assignment of zones between the two methods, and for that reason, overlap between these zones was not examined in further detail.

To evaluate whether it was the presence of the first zone only that influenced age readings, the proportions of otoliths within each age class were evaluated based on counting the seasonal increment patterns (Hüsey *et al.*, 2010) and by traditional age determination methods. In general, traditional age determination seems to have a tendency to underestimate the assumed true age from increment patterns, particularly for the older year classes in that the risk of assigning a wrong (younger) age increases. Apparently, there must be discrepancies other than interpreting the first annulus.

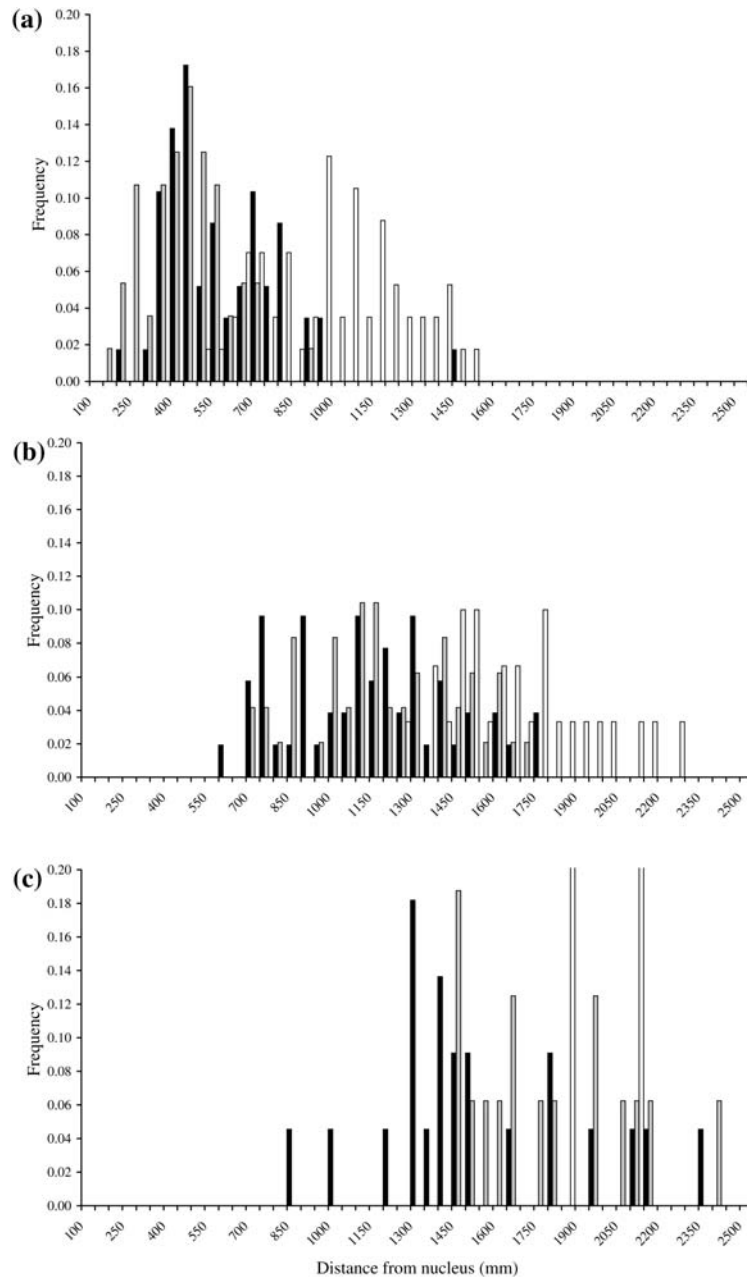

**Figure 3.** Frequency distributions of distance to the nucleus for the different zones derived from the three different methods by consecutive annuli: (a) first annulus, (b) second annulus, and (c) third annulus. Bar colours: black, opacity profile; white, expert reader-defined annuli; grey, daily increment patterns. In (c), the reader-defined annulus frequencies were shortened for consistency between graphs and the two samples actually correspond to a frequency of 0.5.

The results do demonstrate, however, that there are serious differences between the two methods and that these differences are inconsistent between the two years examined here (Table 1).

#### Translucent zones and zones without visible increments

As interpretation of opacity patterns for traditional age determination is a highly subjective procedure, an attempt was made to identify zones with less opacity using a purely subjective method. The frequency distribution of these zones ( $T1$ – $T4$ ) differs from the others in that up to four translucent zones were recorded.

None of the distributions of zone  $T1$  (Figure 3a; KS,  $D = 0.2574$ ,  $p = 0.46$ ) or  $T2$  (Figure 3b; KS,  $D = 0.1394$ ,  $p = 0.72$ ) differed significantly from the corresponding  $U$ -zone distributions. The distribution of  $T3$  and  $U3$  were significantly different (Figure 3c; KS,  $D = 0.5455$ ,  $p < 0.01$ ), but those of  $T4$  and  $U3$  did not differ (KS,  $D = 0.2125$ ,  $p = 0.98$ ). These results imply that zones of low opacity usually co-occur with zones characterized by an absence of visible increments.

To test this hypothesis of overlap in zones within individual otoliths, an index of overlap was calculated for each  $U$ -zone of each otolith. In Table 2, the proportions of fish with and without overlapping zones are shown for each of the three

**Table 1.** Proportion of traditional ages within classes of age estimates from increment patterns for 2001 and 2004, respectively.

| Year | Increment age | Traditional age |             |             |
|------|---------------|-----------------|-------------|-------------|
|      |               | 1               | 2           | 3           |
| 2001 | 1             | <b>0.91</b>     | 0.07        | 0.01        |
|      | 2             | 0.35            | <b>0.65</b> | 0.00        |
|      | 3             | 0.05            | 0.74        | <b>0.21</b> |
| 2004 | 1             | <b>0.64</b>     | 0.35        | 0.01        |
|      | 2             | 0.05            | <b>0.86</b> | 0.10        |
|      | 3             | 0.00            | 0.50        | <b>0.50</b> |

Emboldened values indicate the fields where a value of 1 would indicate total correspondence between the two methods.

**Table 2.** Overlap between zones without increments (*U*-zones) and low opacity (*O*-zones), with a value of 0 indicating no overlap, and a value of 1 indicating overlap.

| Year | Zone | <i>n</i> | Overlap |      |
|------|------|----------|---------|------|
|      |      |          | 0       | 1    |
| 2001 | U1   | 29       | 0.48    | 0.52 |
|      | U2   | 23       | 0.61    | 0.39 |
|      | U3   | 11       | 0.73    | 0.27 |
| 2004 | U1   | 27       | 0.48    | 0.52 |
|      | U2   | 23       | 0.48    | 0.52 |
|      | U3   | 4        | 0.75    | 0.25 |

*U*-zones. Seemingly, there was overlap in approximately half the cod, without any obvious trend with age.

To evaluate whether overlap during the first zone entrains overlap in subsequent years, otoliths with two or more uncountable zones (age  $\geq 2$  years) were selected. In Figure 4, examples are shown for four 2-year-old cod with different overlap patterns. Because of the limited number of fish with three *U*-zones (15 cod), those data were not included in the analysis. There was no significant effect of year (*G*-test,  $G = 3.124$ , d.f. = 3,  $p = 0.99$ ), so data from the two years are combined in Table 3. No consistent pattern in overlap between age classes was evident, in that the distribution into the four possible categories of overlap patterns was completely equal ( $\chi^2$  test,  $\chi^2 = 0.435$ ,  $p = 0.99$ ). In those cases where there was an overlap, the translucent zones seemed to be found before the zone without visible increments was laid down, because the relationship between the two zones was  $T1 = 0.94 \times U1$  ( $n = 29$ ,  $r^2 = 0.21$ ,  $p < 0.05$ ) and  $T2 = 0.82 \times U2$  ( $n = 23$ ,  $r^2 = 0.18$ ,  $p < 0.05$ ). I conclude that opacity patterns are not useful as indicators of zones without visible increments.

To assess whether factors such as size or sex could influence overlap, fish were grouped into four groups: overlap/no overlap in *U1*, and overlap/no overlap in *U2*. No significant differences in fish size were found between these groups (Table 3; ANOVA,  $F = 0.173$ , d.f. = 45,  $p = 0.91$ ). There was no significant effect of size on the number of otoliths within each category (*G*-test,  $G = 2.701$ , d.f. = 3,  $p = 0.95$ ), demonstrating that neither fish size nor sex are the driving forces behind differential overlap in increment and opacity patterns.

## Discussion

Translucent zones are formed during winter/spring in the otoliths of most temperate fish species of the northern hemisphere (Beckman and Wilson, 1995), and Atlantic cod are no exception

(Smedstad and Holm, 1996; Godø and Michalsen, 2000; Pilling *et al.*, 2007; Høie *et al.*, 2009). Several conditions have been hypothesized as key factors, e.g. somatic growth related to food consumption (Geffen and Nash, 1995; Wright *et al.*, 2002a), reproduction (Morales-Nin *et al.*, 1998), photoperiod (Wright *et al.*, 1992), and environmental temperature (Pilling *et al.*, 2007). However, the underlying mechanisms of zone formation, including regional differences, are still poorly understood (Pilling *et al.*, 2007).

Although only little is known of opacity pattern formation in eastern Baltic cod, it is certain that otolith macrostructure formation does not conform to the general pattern. From the few existing studies, it is apparent that translucent zones form virtually throughout the year (Tokareva, 1963), with the greatest frequency from September to May (Tokareva, 1963; Berner, 1968). However, these patterns are not consistent across years (Mosegaard *et al.*, 1997). Also there seems to be an age effect, in that juvenile and young adult fish initiate and end translucent zones earlier in the year (Tokareva, 1963; Berner, 1968). Until recently, no empirical explanation for these irregular opacity patterns was available. Speculations have been many, including genetic and phenotypic differences associated with temperature adaptation (Kändler, 1949; Berner, 1968).

To evaluate the timing of translucent zone formation and the laying down of reader-defined structures, I used seasonal patterns in daily increment widths, which are closely linked to the environmental temperature and hence may serve as an estimator of time (Hüsey *et al.*, 2010). The few reports examining the co-occurrence of daily increment and opacity patterns show that in species from temperate waters, patterns during annulus formation seem to follow a rule: decreasing increments, eventually with disruption in daily formation, along with a translucent zone in winter/spring (Pannella, 1980; Victor and Brothers, 1982; Wright *et al.*, 2002b). Translucent zones may also be laid down between annuli, but they are usually less prominent, and their increment widths do not differ from adjacent increments (Wright *et al.*, 2002b).

The results of this study have demonstrated that there is no general synchrony in the formation of otolith zones without daily increments related to cold water temperatures and translucent zones. The presence of pattern overlap seems to be random and was not even consistent within individual cod, in that overlap in one year did not necessarily entrain overlap the next year. In those cases where overlap was observed, patterns were slightly out of phase, because translucent zones seemed to be laid down before the zone without visible increments. Neither sex nor fish size had a significant influence on overlap. Kändler (1949) suggested a link between hydrographic conditions in the central Baltic Sea and the vertical distribution and migration patterns of cod, which the results of a recent tagging study seem to support (Hüsey *et al.*, 2010). Hence, I now examine possible mechanisms for these deviations from the general pattern within different life stages.

In the Baltic Sea, younger cod are mainly distributed in shallower water, where they experience stronger temperature cycles than at depth (Bagge *et al.*, 1994; Uzars, 1994; Uzars and Plikshs, 2000), with temperatures between 2 and 3°C in February and ca. 15°C in August/September (ICES, 2009). In juvenile fish and coastal areas in general, feeding intensity peaks in late summer (August; Maczassek, 2006), so the seasonal maxima and minima of feeding and temperature cycles are only

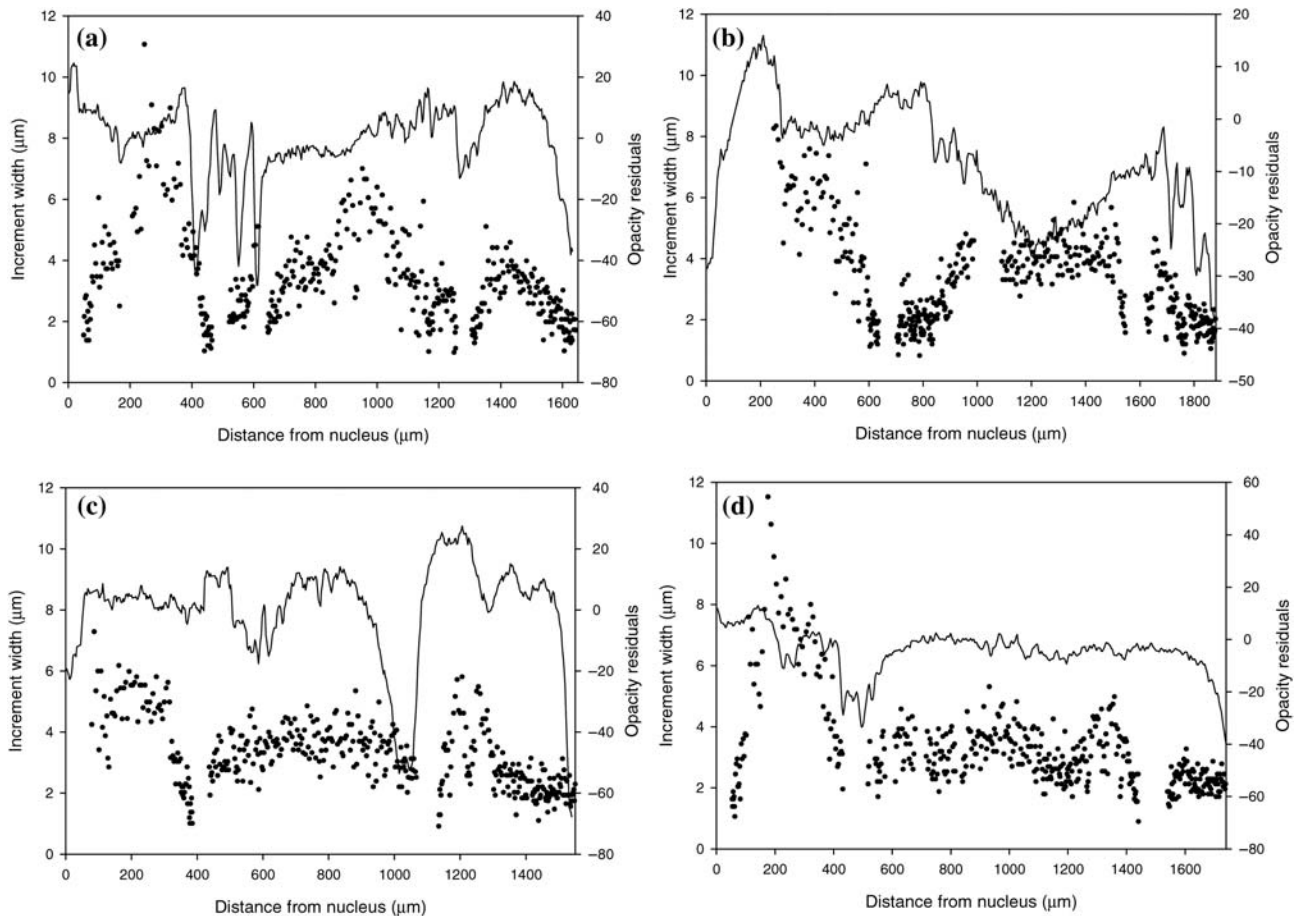

**Figure 4.** Patterns of increment width (dots) and opacity (lines) in four 2-year-old cod with different overlap sequences over the two zones. The numbers in parenthesis following indicate the distance from the nucleus to the first and second zone without increments: (a) overlap in both years (500 and 1300  $\mu\text{m}$ ), (b) no overlap (650 and 1550  $\mu\text{m}$ ), (c) overlap in the second but not the first year (450 and 1100  $\mu\text{m}$ ), (d) overlap in the first but not the second year (450 and 1500  $\mu\text{m}$ ).

**Table 3.** Overlap between zones without increments ( $U$ -zones) and low opacity for consecutive ages ( $U_1$  and  $U_2$ ).

| $U_1$ | $U_2$ | $n_{\text{total}}$ | $n_{\text{female}}$ | $n_{\text{male}}$ | Fish size  |
|-------|-------|--------------------|---------------------|-------------------|------------|
| 0     | 0     | 12                 | 5                   | 7                 | 24.4 (7.4) |
| 0     | 1     | 11                 | 3                   | 8                 | 23.7 (7.6) |
| 1     | 0     | 13                 | 4                   | 9                 | 24.3 (5.2) |
| 1     | 1     | 10                 | 6                   | 4                 | 23.4 (7.1) |

$n$ , number of otoliths, and fish size is the average (s.d.) of fish size (cm).  
Overlap values: 0, no overlap; 1, overlap.

slightly out of phase, with last food consumption just before the time of lowest temperature. This synchrony explains the overlap in zones without visible increments with translucent zones, and the appearance of translucent bands before the coldest period. However, overlap was found only in about half the samples, perhaps because of the distribution patterns of juvenile cod, which also live in deeper water (Nielsen *et al.*, 1997), where the peaks of maximum/minimum temperatures are later in the year (ICES, 2009). With the present samples, it was unfortunately impossible to resolve this hypothesis.

In adult cod, additional variation may be introduced. Baltic cod mature at 27 cm and an age of 2.2 years (ICES, 2009), so start their summer spawning migrations into the central Bornholm Basin

with the onset of colder temperature. With these migrations, the seasonal pattern in feeding changes, both with respect to prey species and quantity of food consumed (Zalachowski *et al.*, 1975; Bagge, 1981; Bagge and Bay, 1987; Bagge *et al.*, 1994; Maczasek, 2006). Maximum food consumption is in May and the seasonal low in summer (Bagge, 1981; Maczasek, 2006). In reproductively active cod, the seasonal maxima and minima in the temperature and feeding cycles are therefore out of phase, explaining the decoupling between zones without increments and translucent zones, but not the inconsistency between years. Recent evidence from electronic data storage tags shows that the temperature response of opacity formation depends on migration behaviour and the timing of the migration (Hüssy *et al.*, 2010). Inconsistency in pattern formation between individuals and years may therefore be attributable to skipped spawning, which is known for Baltic cod (Tomkiewicz *et al.*, 2003). Also, the prolonged spawning season in Baltic cod (from April through September; Wieland *et al.*, 2000) may act to enforce variability between individuals, resulting in the observed lack of a general annual periodicity in transparency patterns.

It is therefore unsurprising that age determination of Baltic cod based on counting annuli is a difficult task and that the estimates of age are subject to inconsistencies (Reeves, 2003; ICES, 2006). The study has shown that the first true annulus is apparently

missed by age readers, but that the reader-defined first annulus corresponds to the first translucent zone. Kändler (1949) realized that the first annulus of particularly late-hatched cod may not be clearly defined owing to the small size of the otoliths. Subsequent reader-defined annuli do not overlap with zones lacking increments, and only slightly with translucent zones. All this shows clearly how subjective the interpretation of eastern Baltic cod otoliths can be and supports the need for further scientific evaluation of growth zones and age. Apparently, seasonal patterns in daily increment widths can be used to validate at least the first annulus, but this study has shown that the age readings of older fish are questionable. This poses a serious problem to stock assessment, because even small errors in age determination resulting in over- or underestimation influences the values of fishing mortality and spawning-stock biomass (Reeves, 2003). The results here seemingly call for the development and implementation of new methods of age determination, possibly using increment width analysis, and particularly to validate the true age of Baltic cod.

### Acknowledgements

The study was funded by the EU Open Call for Tenders—Reference FISH/2006/15: “ImproveD mEthodology for Baltic COD age Estimation” (DECODE). I thank B. Nielsen, National Institute of Aquatic Resources, Technical University of Denmark, and Hanna Wróblewska, Sea Fisheries Institute, Poland, for preparing the otolith slides, and two anonymous reviewers whose comments helped improve an earlier draft of the manuscript.

### References

- Bagge, O. 1981. The yearly consumption of cod in the Baltic and the Kattegat as estimated from stomach content. ICES Document CM 1981/J: 27. 31 pp.
- Bagge, O., and Bay, J. 1987. Periodicity of feeding in Baltic cod. ICES Document CM 1987/J: 08. 14 pp.
- Bagge, O., Thurow, F., Steffensen, E., and Bay, J. 1994. The Baltic cod. *Dana*, 10: 1–28.
- Beckman, D., and Wilson, C. A. 1995. Seasonal timing of opaque zone formation in fish otoliths. In *Recent Developments in Fish Otolith Research*, pp. 27–44. Ed. by D. H. Secor, J. M. Dean, and S. E. Campana. University of South Carolina Press, Columbia, SC.
- Berner, M. 1968. Einige orientierende Untersuchungen und den Otolithen des Dorsches (*Gadus morhua* L.) aus verschiedenen Regionen der Ostsee. *Fischerei-Forschung Wissenschaftliche Schriftenreihe*, 6: 77–86.
- Björnsson, B., and Steinarrson, A. 2002. The food-unlimited growth rate of Atlantic cod (*Gadus morhua*). *Canadian Journal of Fisheries and Aquatic Sciences*, 59: 494–502.
- Campana, S. E. 2001. Accuracy, precision and quality control in age determination, including a review of the use and abuse of age validation methods. *Journal of Fish Biology*, 59: 197–242.
- Campana, S. E., and Thorrold, S. R. 2001. Otoliths, increments, and elements: keys to a comprehensive understanding of fish populations? *Canadian Journal of Fisheries and Aquatic Sciences*, 58: 30–38.
- CODYSEY. 2007. Cod spatial dynamics and vertical movements in European waters and implications for fishery management. Final Report EU Framework VI Programme, Project Q5RS-2002-00813.
- Doering-Arjes, P., Cardinale, M., and Mosegaard, H. 2008. Estimating population age structure using otolith morphometrics: a test with known-age Atlantic cod (*Gadus morhua*) individuals. *Canadian Journal of Fisheries and Aquatic Sciences*, 65: 2342–2350.
- Geffen, A. J., and Nash, R. D. M. 1995. Periodicity of otolith check formation in juvenile plaice *Pleuronectes platessa* L. In *Recent Developments in Fish Otolith Research*, pp. 65–73. Ed. by D. J. Secor, J. M. Dean, and S. E. Campana. University of South Carolina Press, Columbia, SC.
- Godø, O. R., and Michalsen, K. 2000. Migratory behaviour of north-east Arctic cod, studied by use of data storage tags. *Fisheries Research*, 48: 127–140.
- Høie, H., and Folkvord, A. 2006. Estimating the timing of growth rings in Atlantic cod otoliths using stable oxygen isotopes. *Journal of Fish Biology*, 68: 826–837.
- Høie, H., Millner, R. S., McCully, S., Nedreaas, K. H., Pilling, G. M., and Skadal, J. 2009. Latitudinal differences in the timing of otolith growth: a comparison between the Barents Sea and southern North Sea. *Fisheries Research*, 96: 319–322.
- Hüsey, K., Hinrichsen, H.-H., Fey, D. P., Walther, Y., and Velasco, A. 2010. The use of otolith microstructure to estimate age in adult Atlantic cod *Gadus morhua*. *Journal of Fish Biology*, 76: 1640–1654.
- Hüsey, K., and Mosegaard, H. 2004. Atlantic cod (*Gadus morhua*) growth and otolith accretion characteristics modelled in a bioenergetics context. *Canadian Journal of Fisheries and Aquatic Sciences*, 61: 1021–1031.
- Hüsey, K., Nielsen, B., Mosegaard, H., and Worsøe Clausen, L. 2009. Using data storage tags to link otolith macrostructure in Baltic cod (*Gadus morhua*) with environmental conditions. *Marine Ecology Progress Series*, 378: 161–170.
- IBACS. 2006. Integrated approach to the biological basis of age estimation in commercially important fish species. Final Report EU Framework VI Programme, Project QQLRT-2001-01610.
- ICES. 2006. Report of the Study Group on Ageing Issues of Baltic Cod (SGABC). ICES Document CM 2006/BCC: 08. 49 pp.
- ICES. 2009. ICES oceanographic data. <http://www.ices.dk/ocean/aspx/HydChem/HydChem.aspx>.
- Jøbling, M. 1988. A review of the physiological and nutritional energetics of cod, *Gadus morhua* L., with particular reference to growth under farmed conditions. *Aquaculture*, 70: 1–19.
- Kändler, R. 1949. Untersuchungen über den Ostseedorsch während der Forschungsfahrten mit dem R.F.D. “Poseidon” in den Jahren 1925–1938. *Berichte der Deutschen Wissenschaftlichen Kommission für Meeresforschung*, 11: 137–245.
- MacKenzie, B. R., Hinrichsen, H.-H., Plikshs, M., Wieland, K., and Zezera, A. S. 2000. Quantifying environmental heterogeneity: habitat size necessary for successful development of cod *Gadus morhua* eggs in the Baltic Sea. *Marine Ecology Progress Series*, 193: 143–156.
- Maczassek, K. 2006. Nahrungsökologie des Dorsches (*Gadus morhua* L.) in der zentralen Ostsee. Thesis, Christian-Albrechts-Universität, Kiel. 75 pp.
- Matthäus, W., and Franck, H. 1992. Characteristics of major Baltic inflows—a statistical analysis. *Continental Shelf Research*, 12: 1375–1400.
- Morales-Nin, B., Torres, G. J., Lombarte, A., and Recasens, L. 1998. Otolith growth and age estimation in the European hake. *Journal of Fish Biology*, 53: 1155–1168.
- Mosegaard, H., Hüsey, K., and Sparrevohn, C. 1997. Back-calculating Baltic cod size at age from otolith measurements. ICES Document CM 1997/S: 09. 21 pp.
- Mosegaard, H., and Titus, R. 1987. Daily growth rates of otoliths in yolk sac fry of two salmonid species at five different temperatures. In *Proceedings of the Fifth Congress of European Ichthyologists*, pp. 221–227. Ed. by S. O. Kallander, and B. Farnholm. Swedish Museum of Natural History, Stockholm, Sweden.
- Nielsen, J. R., Lundgren, B., and Lehman, K. M. 1997. Describing distribution and density patterns of metamorphosed 0- and 1-group cod related to hydrographical conditions, physical frontal zones, and bottom topography using hydroacoustic and trawl sampling methods in the central Baltic Sea (preliminary results). ICES Document CM 1997/S: 19. 39 pp.

- Otterlei, E., Folkvord, A., and Nyhammer, G. 2002. Temperature-dependent otolith growth of larval and early juvenile Atlantic cod (*Gadus morhua*). ICES Journal of Marine Science, 59: 851–860.
- Pannella, G. 1974. Otolith growth patterns: an aid in age determination in temperate and tropical fishes. In Ageing of Fish, pp. 28–39. Ed. by T. B. Bagenal. Unwin Bros, Surrey, UK.
- Pannella, G. 1980. Growth patterns in fish sagittae. In Skeletal Growth of Aquatic Organisms, pp. 519–560. Ed. by D. C. Rhoads, and R. A. Lutz. Plenum Press, New York.
- Pilling, G., Millner, R., Easey, M., Maxwell, D., and Tidd, A. 2007. Phenology and North Sea cod (*Gadus morhua* L.): has climate change affected otolith annulus formation and cod growth? Journal of Fish Biology, 70: 584–599.
- R Development Core Team. 2009. R: a language and environment for statistical computing. R Foundation for Statistical Computing, Vienna. <http://www.R-project.org>.
- Reeves, S. A. 2003. A simulation study of the implications of age-reading errors for stock assessment and management advice. ICES Journal of Marine Science, 60: 314–328.
- Reibisch, J. 1899. Über die Eizahl bei *Pleuronectes platessa* und die Altersbestimmung dieser Form aus den Otolithen. Wissenschaftliche Meeresuntersuchungen, 4: 232–248.
- Schinke, H., and Matthäus, W. 1998. On the causes of major Baltic inflows—an analysis of long time series. Continental Shelf Research, 18: 67–97.
- Smedstad, O. M., and Holm, J. C. 1996. Validation of back-calculated formulae for cod otoliths. Journal of Fish Biology, 49: 976–985.
- Tokareva, G. I. 1963. Metodika opredelenija vozrasta i osobennosti rosta treski baltijskogo morja. Trudy AtlantNIRO, 10: 179–191.
- Tomkiewicz, J., Tybjerg, L., and Jespersen, Å. 2003. Micro- and macroscopic characteristics to stage gonadal maturation of female Baltic cod. Journal of Fish Biology, 62: 253–275.
- Uzars, D. 1994. Feeding of cod (*Gadus morhua callarias* L.) in the central Baltic in relation to environmental changes. ICES Marine Science Symposia, 198: 612–623.
- Uzars, D., and Plikshs, M. 2000. Cod (*Gadus morhua* L.) cannibalism in the central Baltic: interannual variability and influence of recruit abundance and distribution. ICES Journal of Marine Science, 57: 324–329.
- Victor, B. C., and Brothers, E. B. 1982. Age and growth of the fallfish *Semotilus corporalis* with daily otolith increments as a method of annulus verification. Canadian Journal of Zoology, 60: 2543–2550.
- Volk, E. C., Schroder, S. L., and Fresh, K. L. 1990. Inducement of unique otolith banding patterns as a practical means to mass-mark juvenile Pacific salmon. American Fisheries Society Symposium, 7: 203–215.
- Weidman, C. R., and Millner, R. 2000. High-resolution stable isotope records from North Atlantic cod. Fisheries Research, 46: 327–342.
- Wieland, K., Jarre-Teichmann, A., and Horbowa, K. 2000. Changes in the timing of spawning of Baltic cod: possible causes and implications for recruitment. ICES Journal of Marine Science, 57: 452–464.
- Wright, P. J., Panfili, J., Morales-Nin, B., and Geffen, A. J. 2002a. Types of calcified structures. A. Otoliths. In Manual of Fish Sclerochronology, pp. 31–57. Ed. by J. Panfili, H. Pontual, H. Troadec, and P. J. Wright. IFREMER-IRD Co-edition, Brest, France. 463 pp.
- Wright, P. J., Talbot, C., and Thorpe, J. E. 1992. Otolith calcification in Atlantic salmon parr, *Salmo salar* L., and its relation to photoperiod and calcium metabolism. Journal of Fish Biology, 40: 779–790.
- Wright, P. J., Woodroffe, D. A., Gibb, F. M., and Gordon, J. D. M. 2002b. Verification of first annulus formation in the illicia and otoliths of white anglerfish, *Lophius piscatorius* using otolith microstructure. ICES Journal of Marine Science, 59: 587–593.
- Zalachowski, W., Szypula, J., Krzykowski, S., and Krzykawska, I. 1975. Feeding of some commercial fishes in the southern region of the Baltic Sea—in 1971 and 1972. Polish Archives of Hydrobiology, 22: 429–448.

doi:10.1093/icesjms/fsq023
